# Supplementary material for: Epidemiology of Moderate-to-Severe Respiratory Syncytial Virus Infections in Children in Subtropical Okinawa, Japan: A Four-Year Retrospective Study
Source: Research Square preprint supplement (doi:10.21203/rs.3.rs-7316076/v1), 2025-08-27
Supplement: Supplementary file 1 [file c6cc23a9304597f09ddddedc.xlsx]

## Sheet: Table 1
Table 1 Background of Patients with Moderate to Severe RSV infection
				Moderate	Severe	Total
Case				1424	117	1541
Median Age, month (IQR)				10 (3-16)	3 (1-11)*	9 (3-16)
Female (%)				640 (44.9)	63 (53.8)	703 (45.6)
Presence of Sibilings (%)				936/1225 (76.4)	98/111 (88.3)*	1034/1336 (77.4)
Attending Daycare (%)				613/1120 (54.7)	42/105 (40.0)*	655/1225 (53.5)
Preterm (%)				138 (9.7)	10 (8.5)	148 (9.6)
Underlying Diseases (%)				206 (14.5)	22 (18.8)	228 (14.8)
	Respiratory (R)			80	7	87
	Cardiovascular (CV)			23	4	27
	Neurological (N)			20	1	21
	Allergic (A)			15	0	15
	Chromosomal (Ch)			11	0	11
	Kidney (K)			5	0	5
	Hematologic and Oncologic (HO)			2	0	2
	Endocrine and Metabolic (EM)			2	1	3
	Others (Oth)			11	2	13
	CV+Ch			7	1	8
	R+N			6	1	7
	R+Ch			3	2	5
	R+CV			4	1	5
	CV+N			4	0	4
	R+A			3	0	3
	R+EM			2	0	2
	R+Oth			2	0	2
	A+K			1	0	1
	K+HO			1	0	1
	R+CV+Ch			1	0	1
	CV+Ch+EM			1	0	1
	CV+Ch+Ot			1	0	1
	R+N+A			1	0	1
	R+CV+Ot			0	1	1
	R+CV+ N+Ch+Ot			0	1	1
*, Significantly different from moderate RSV infection (p<0.05)

## Sheet: Table 2
Table 2 Respiratory support and Outcomes in patients with Moderate to SevereRSV infections
				Moderate, n=1424 (%)	Severe, n=117 (%)
Respiratory support (cumulatetive)
	Normal flow O2 support (facial mask)			898 (63.1)	100 (85.5)
	High-flow Nasal Cannula O2 support			204 (14.3)	110 (94.0)
	Tracheal Intubation & Mechanical Ventilation			3 (0.2)	48 (41.0)
	No O2 support			501 (35.2)	1 (0.9)
Outcomes
	Recovered without Complications			1424 (100)	114 (97.4)
	Recovered with Complications			0	3 (2.6)
	Died			0	0

## Sheet: Table 1(1)
Table1. Characteristics of Children with RSV infection
	Total	Severe	Moderate	P	血液培養採取	1133
Case	1541	117	1424		血培陽性	22
Median Age, month (IQR)	9 (3-16)	3 (1-11)	10 (3-16)	<0.05
Female (%)	703 (45.6)	63 (53.8)	640 (44.9)	0.0669	1562→1541例
Presence of sibilings (%)	1034/1336 (77.4)	98/111 (88.3)	936/1225 (76.4)	<0.05
Attending daycare (%)	655/1225 (53.5)	42/105 (40.0)	613/1120 (54.7)	<0.05
Preterm (%)	148 (9.6)	10 (8.5)	138 (9.7)	0.87
Underlying diseases (%)	228 (14.8)	22 (18.8)	206 (14.5)	0.222
Respiratory (R)	87	7	80
Cardiovascular (CV)	27	4	23
Neurological (N)	21	1	20
Allergic (A)	15	0	15
Chromosomal (Ch)	11	0	11
Kidney (K)	5	0	5
Hematologic and Oncologic (HO)	2	0	2
Endocrine and Metabolic (EM)	3	1	2
Others (Ot)	13	2	11
CV+Ch	8	1	7
R+N	7	1	6
R+Ch	5	2	3
R+CV	5	1	4
CV+N	4	0	4
R+A	3	0	3
R+EM	2	0	2
R+Ot	2	0	2
R+CV+ N+Ch+Ot	1	1	0
R+CV+Ch	1	0	1
CV+Ch+EM	1	0	1
CV+Ch+O	1	0	1
R+N+A	1	0	1
R+CV+Ot	1	1	0
A+K	1	0	1
K+HO	1	0	1

## Sheet: Table 1 (2)
Table1 Background of patients with moderate and severe RSV infection
	Total	Severe	Moderate
Case	1541	117	1424
Median Age, month (IQR)	9 (3-16)	3 (1-11)*	10 (3-16)
Female (%)	703 (45.6)	63 (53.8)	640 (44.9)
Presence of sibilings (%)	1034/1336 (77.4)	98/111 (88.3)*	936/1225 (76.4)
Attending daycare (%)	655/1225 (53.5)	42/105 (40.0)*	613/1120 (54.7)
Preterm (%)	148 (9.6)	10 (8.5)	138 (9.7)
Underlying diseases (%)	228 (14.8)	22 (18.8)	206 (14.5)
Respiratory (R)	87	7	80
Cardiovascular (CV)	27	4	23
Neurological (N)	21	1	20
Allergic (A)	15	0	15
Chromosomal (Ch)	11	0	11
Kidney (K)	5	0	5
Hematologic and Oncologic (HO)	2	0	2
Endocrine and Metabolic (EM)	3	1	2
Others (Ot)	13	2	11
CV+Ch	8	1	7
R+N	7	1	6
R+Ch	5	2	3
R+CV	5	1	4
CV+N	4	0	4
R+A	3	0	3
R+EM	2	0	2
R+Ot	2	0	2
A+K	1	0	1
K+HO	1	0	1
R+CV+Ch	1	0	1
CV+Ch+EM	1	0	1
CV+Ch+O	1	0	1
R+N+A	1	0	1
R+CV+Ot	1	1	0
R+CV+ N+Ch+Ot	1	1	0
*, significantly different from moderate RSV infection (p<0.05)

## Sheet: Table 2(1)
Table 2 Respiratory support and Outcomes in patients with Moderate to SevereRSV infections
				Severe, n=117 (%)	Moderate, n=1424 (%)
Respiratory support (cumulatetive)
	Normal flow O2 support (facial mask)			100 (85.5)	898 (63.1)
	High-flow Nasal Cannula O2 support			110 (94.0)	204 (14.3)
	Tracheal Intubation & Mechanical Ventilation			48 (41.0)	3 (0.2)
	No O2 support			1 (0.9)	501 (35.2)
Outcomes
	Recovered without Complications			114 (97.4)	1424 (100)
	Recovered with Complications			3 (2.6)	0
	Died			0	0
